# Supplementary material
Source: publisher figshare collection journal article supplement (https://acs.figshare.com/ndownloader/files/12794813)
Supplement: Supplementary file 1 [file 12794813]

Archive with 2 entries (2 files):
- HEA2SnI4-orthorhombic.cif
- HEA2SnI4-orthorhombic-checkcif.pdf
